# Supplementary material
Source: PubMed Central journal article supplement (PMC5145785)
Supplement: NIHMS797358-supplement-01.pdf [file NIHMS797358-supplement-01.pdf]

## Supplementary 1

### Complete list of included studies

- Albein-Urios, N., Verdejo-Román, J., Asensio, S., Soriano-Mas, C., Martínez-González, J. M., & Verdejo-García, A. (2014). Re-appraisal of negative emotions in cocaine dependence: Dysfunctional corticolimbic activation and connectivity. *Addiction Biology*, 19, 415–426. doi:10.1111/j.1369-1600.2012.00497.x
- Beauregard, M., Paquette, V., & Lévesque, J. (2006). Dysfunction in the neural circuitry of emotional self-regulation in major depressive disorder. *Neuroreport*, 17(8), 843–846. doi:10.1097/01.wnr.0000220132.32091.9f
- Blair, K. S., Geraci, M., Smith, B. W., Hollon, N., DeVido, J., Otero, M., ... Pine, D. S. (2012). Reduced dorsal anterior cingulate cortical activity during emotional regulation and top-down attentional control in generalized social phobia, generalized anxiety disorder, and comorbid generalized social phobia/generalized anxiety disorder. *Biological Psychiatry*, 72(6), 476–82. doi:10.1016/j.biopsych.2012.04.013
- Davis, T. S., Mauss, I. B., Lumian, D., Troy, A. S., Shallcross, A. J., Zanolia, P., ... McRae, K. (2014). Emotional reactivity and emotion regulation among adults with a history of self-harm: Laboratory self-report and functional MRI evidence. *Journal of Abnormal Psychology*, 123(3), 499–509. doi:10.1037/a0036962
- Denny, B. T., Fan, J., Liu, X., Ochsner, K. N., Guerrerri, S., Mayson, S. J., ... Koenigsberg, H. W. (2015). Elevated amygdala activity during reappraisal anticipation predicts anxiety in avoidant personality disorder. *Journal of Affective Disorders*, 172, 1–7. doi:10.1016/j.jad.2014.09.017
- Dillon, D. G., & Pizzagalli, D. A. (2013). Evidence of successful modulation of brain activation and subjective experience during reappraisal of negative emotion in unmedicated depression. *Psychiatry Research - Neuroimaging*, 212(2), 99–107. doi:10.1016/j.psychresns.2013.01.001
- Erk, S., Mikschl, A., Stier, S., Ciaramidaro, A., Gapp, V., Weber, B., & Walter, H. (2010). Acute and sustained effects of cognitive emotion regulation in major depression. *The Journal of Neuroscience : The Official Journal of the Society for Neuroscience*, 30(47), 15726–15734. doi:10.1523/JNEUROSCI.1856-10.2010
- Gaebler, M., Daniels, J., Lamke, J.-P., Fydrich, T., & Walter, H. (2014). Behavioural and neural correlates of self-focused emotion regulation in social anxiety disorder. *Journal of Psychiatry & Neuroscience*, 39(4), 249–258. doi:10.1503/jpn.130080
- Goldin, P. R., Manber, T., Hakimi, S., Canli, T., & Gross, J. J. (2009a). Neural bases of social anxiety disorder: emotional reactivity and cognitive regulation during social and physical threat. *Archives of General Psychiatry*, 66(2), 170–180. doi:10.1001/archgenpsychiatry.2008.525
- Goldin, P. R., Manber-Ball, T., Werner, K., Heimberg, R., & Gross, J. J. (2009b). Neural mechanisms of cognitive reappraisal of negative self-beliefs in social anxiety disorder. *Biological Psychiatry*, 66(12), 1091–1099. doi:10.1016/j.biopsych.2009.07.014

- Greening, S. G., Osuch, E. A., Williamson, P. C., & Mitchell, D. G. V. (2014). The neural correlates of regulating positive and negative emotions in medication-free major depression. *Social Cognitive and Affective Neuroscience*, 9(5), 628–37. doi:10.1093/scan/nst027
- Heller, A. S., Johnstone, T., Shackman, A. J., Light, S. N., Peterson, M. J., Kolden, G. G., ... Davidson, R. J. (2009). Reduced capacity to sustain positive emotion in major depression reflects diminished maintenance of fronto-striatal brain activation. *Proceedings of the National Academy of Sciences of the United States of America*, 106(52), 22445–22450. doi:10.1073/pnas.0910651106
- Johnstone, T., van Reekum, C. M., Urry, H. L., Kalin, N. H., & Davidson, R. J. (2007). Failure to Regulate: Counterproductive Recruitment of Top-Down Prefrontal-Subcortical Circuitry in Major Depression. *Journal of Neuroscience*, 27(33), 8877–8884. doi:10.1523/JNEUROSCI.2063-07.2007
- Kanske, P., Heissler, J., Schönfelder, S., & Wessa, M. (2012). Neural correlates of emotion regulation deficits in remitted depression: The influence of regulation strategy, habitual regulation use, and emotional valence. *NeuroImage*, 61(3), 686–693. doi:10.1016/j.neuroimage.2012.03.089
- Kanske, P., Schönfelder, S., Forneck, J., & Wessa, M. (2015). Impaired regulation of emotion: neural correlates of reappraisal and distraction in bipolar disorder and unaffected relatives. *Translational Psychiatry*, 5, e497. doi:10.1038/tp.2014.137
- Koenigsberg, H. W., Fan, J., Ochsner, K. N., Liu, X., Guise, K. G., Pizzarello, S., ... Siever, L. J. (2009). Neural Correlates of the Use of Psychological Distancing to Regulate Responses to Negative Social Cues: A Study of Patients with Borderline Personality Disorder. *Biological Psychiatry*, 66, 854–863. doi:10.1016/j.biopsych.2009.06.010
- Lang, S., Kotchoubey, B., Frick, C., Spitzer, C., Grabe, H. J., & Barnow, S. (2012). Cognitive reappraisal in trauma-exposed women with borderline personality disorder. *NeuroImage*, 59(2), 1727–34. doi:10.1016/j.neuroimage.2011.08.061
- Manber-Ball, T., Ramsawh, H. J., Campbell-Sills, L., Paulus, M. P., & Stein, M. B. (2013). Prefrontal dysfunction during emotion regulation in generalized anxiety and panic disorders. *Psychological Medicine*, 43(7), 1475–1486. doi:10.1017/S0033291712002383
- Marissen, M. A. E., Meuleman, L., & Franken, I. H. A. (2010). Altered emotional information processing in borderline personality disorder: an electrophysiological study. *Psychiatry Research*, 181(3), 226–32. doi:10.1016/j.psychres.2009.10.006
- Morris, R. W., Sparks, A., Mitchell, P. B., Weickert, C. S., & Green, M. J. (2012). Lack of cortico-limbic coupling in bipolar disorder and schizophrenia during emotion regulation. *Translational Psychiatry*, (3), 2:e90. doi:10.1038/tp.2012.16
- New, A. S., Fan, J., Murrough, J. W., Liu, X., Liebman, R. E., Guise, K. G., ... Charney, D. S. (2009). A functional magnetic resonance imaging study of deliberate emotion regulation in resilience and posttraumatic stress disorder. *Biological Psychiatry*, 66(7), 656–664. doi:10.1016/j.biopsych.2009.05.020

- Paul, S., Simon, D., Endrass, T., & Kathmann, N. (2015). Altered emotion regulation in obsessive-compulsive disorder as evidenced by the late positive potential. *Psychological Medicine*, 1–11. doi:10.1017/S0033291715001610
- Rabinak, C. a., MacNamara, A., Kennedy, A. E., Angstadt, M., Stein, M. B., Liberzon, I., & Phan, K. L. (2014). Focal and Aberrant Prefrontal Engagement During Emotion Regulation in Veterans With Posttraumatic Stress Disorder. *Depression and Anxiety*, 31, 851–861. doi:10.1002/da.22243
- Reinecke, A., Filippini, N., Berna, C., Western, D. G., Hanson, B., Cooper, M. J., ... Harmer, C. (2015). Effective emotion regulation strategies improve fMRI and ECG markers of psychopathology in panic disorder: Implications for psychological treatment. *Translational Psychiatry*, 5, e673. doi:10.1038/tp.2015.160
- Reinecke, A., Thilo, K., Filippini, N., Croft, A., & Harmer, C. J. (2014). Predicting rapid response to cognitive-behavioural treatment for panic disorder: The role of hippocampus, insula, and dorsolateral prefrontal cortex. *Behaviour Research and Therapy*, 62, 120–128. doi:10.1016/j.brat.2014.07.017
- Schulze, L., Domes, G., Krüger, A., Berger, C., Fleischer, M., Prehn, K., ... Herpertz, S. C. (2011). Neuronal Correlates of Cognitive Reappraisal in Borderline Patients with Affective Instability. *Biological Psychiatry*, 69(6), 564–573. doi:10.1016/j.biopsych.2010.10.025
- Smoski, M. J., Keng, S. L., Schiller, C. E., Minkel, J., & Dichter, G. S. (2013). Neural mechanisms of cognitive reappraisal in remitted major depressive disorder. *Journal of Affective Disorders*, 151(1), 171–177. doi:10.1016/j.jad.2013.05.073
- Townsend, J. D., Torrisi, S. J., Lieberman, M. D., Sugar, C. a, Bookheimer, S. Y., & Altshuler, L. L. (2013). Frontal-amygdala connectivity alterations during emotion downregulation in bipolar I disorder. *Biological Psychiatry*, 73(2), 127–35. doi:10.1016/j.biopsych.2012.06.030
- van der Meer, L., Swart, M., van der Velde, J., Pijnenborg, G., Wiersma, D., Bruggeman, R., & Aleman, A. (2014). Neural correlates of emotion regulation in patients with schizophrenia and non-affected siblings. *PloS One*, 9(6), e99667. doi:10.1371/journal.pone.0099667
- Wang, X., Feng, Z., Zhou, D., Lei, X., Liao, T., Zhang, L., ... Li, J. (2014). Dissociable self effects for emotion regulation: a study of chinese major depressive outpatients. *BioMed Research International*, 2014, 390865. doi:10.1155/2014/390865
- Woodward, S. H., Shurick, A. A., Alvarez, J., Kuo, J., Nonyieva, Y., Blechert, J., ... Gross, J. J. (2015). A psychophysiological investigation of emotion regulation in chronic severe posttraumatic stress disorder. *Psychophysiology*, 52(5), 667–678. doi:10.1111/psyp.12392
- Wu, L., Winkler, M. H., Wieser, M. J., Andreatta, M., Li, Y., & Pauli, P. (2015). Emotion regulation in heavy smokers: experiential, expressive and physiological consequences of cognitive reappraisal. *Frontiers in Psychology*, 6(October), 1–11. doi:10.3389/fpsyg.2015.01555
- Ziv, M., Goldin, P. R., Jazaieri, H., Hahn, K. S., & Gross, J. J. (2013). Emotion regulation in social anxiety disorder: behavioral and neural responses to three socio-emotional tasks. *Biology of Mood & Anxiety Disorders*, 3, (1):20. doi:10.1186/2045-5380-3-20

| First author             | Year  | Population | n  | Analysis space | vIPFC                 | dIPFC                | amygdala               | dACC     | parietal                              | SMA/PM                |
|--------------------------|-------|------------|----|----------------|-----------------------|----------------------|------------------------|----------|---------------------------------------|-----------------------|
| <b>Mood disorders</b>    |       |            |    |                |                       |                      |                        |          |                                       |                       |
| Beauregard               | 2006  | MDD        | 12 | MNI            | -                     | -                    | 26/-6/-14              | 4/17/19  | -                                     | -                     |
| Johnstone                | 2007  | MDD        | 21 | TAL            | -47/24/0              | 32/46/25             | -                      | -        | -                                     | -                     |
| Heller                   | 2009  | MDD        | 27 | -              | -                     | -                    | -                      | -        | -                                     | -                     |
| Erk                      | 2010  | MDD        | 17 | MNI            | -                     | 36/44/28             | -                      | -        | -                                     | -                     |
| Dillon                   | 2013  | MDD        | 12 | -              | -                     | -                    | -                      | -        | -                                     | -                     |
| Wang                     | 2014  | MDD        | 12 | TAL            | -48/20/-4             | -                    | -20/-2/-16             | -        | -                                     | -                     |
| Greening                 | 2014  | MDD        | 19 | MNI            | -                     | -                    | -                      | -        | 29/-51,53                             | -47/-1/43             |
| Kanske                   | 2012  | rMDD       | 23 | MNI            | -                     | -                    | -15/-1/-14             | -        | -                                     | -                     |
| Smoski                   | 2013  | rMDD       | 18 | MNI            | -                     | -                    | -                      | -        | -                                     | 42/10/50              |
| Morris                   | 2012  | BD         | 13 | MNI            | 40/42/-10             | -                    | -                      | -        | -                                     | -                     |
| Townsend                 | 2013  | BD         | 30 | MNI            | -32/26/-2<br>38/38/-8 | -44/38/20<br>50/38/8 | -                      | -12/8/34 | 64/-20/24<br>44/-36/52                | 26/-18/60             |
| Kanske                   | 2015  | BD         | 22 | MNI            | -                     | -                    | -15/-4/-17<br>21/5/-26 | -        | -                                     | -                     |
| <b>Anxiety disorders</b> |       |            |    |                |                       |                      |                        |          |                                       |                       |
| New                      | 2009  | PTSD       | 14 | MNI            | -                     | -44/8/48             | -                      | -        | -                                     | -6/15/52              |
| Rabinak                  | 2014  | PTSD       | 21 | MNI            | -                     | -44/16/26            | -                      | -        | -                                     | -                     |
| Blair                    | 2012  | GAD        | 17 | MNI            | -                     | -                    | -                      | -5/12/35 | 20/-75/50                             | -                     |
| Blair                    | 2012  | GAD/SAD    | 17 | MNI            | -                     | -                    | -                      | -5/12/35 | 20/-75/50                             | -                     |
| Manber-Ball              | 2013  | GAD        | 23 | TAL            | -                     | 34/7/28              | -                      | -        | -                                     | -38/3/32              |
| Manber-Ball              | 2013  | PD         | 18 | TAL            | -                     | 34/7/28              | -                      | -        | -                                     | -38/3/32              |
| Reinecke                 | 2015  | PD         | 18 | MNI            | 48/56/-2              | -                    | -                      | -        | -                                     | -                     |
| Goldin                   | 2009a | SAD        | 15 | TAL            | -                     | 21/49/29             | -                      | 10/-6/46 | 21/-65/63<br>-21/-48/70<br>-41/-37/50 | 58/4/36<br>-24/-10/46 |
| Goldin                   | 2009b | SAD        | 27 | TAL            | 55/21/-2<br>-34/28/-2 | 52/25/22             | -                      | 3/14/29  | 55/-58/32<br>-38/-65/53               | 0/21/63               |
| Blair                    | 2012  | SAD        | 19 | MNI            | -                     | -                    | -                      | -5/12/35 | 20/-75/50                             | -                     |
| Ziv                      | 2013  | SAD        | 27 | TAL            | -31/52/-6             | -                    | -                      | 0/18/33  | -                                     | -                     |
| Gaebler                  | 2014  | SAD        | 21 | -              | -                     | -                    | -                      | -        | -                                     | -                     |
| <b>Other disorders</b>   |       |            |    |                |                       |                      |                        |          |                                       |                       |
| Albein-                  | 2014  | CUD        | 17 | MNI            | 64/2/8                | -36/44/22            | -                      | -        | -                                     | -                     |

|              |      |      |    |     |            |           |          |          |            |            |
|--------------|------|------|----|-----|------------|-----------|----------|----------|------------|------------|
| Urios        |      |      |    |     | -56/8/6    |           |          |          |            |            |
| Morris       | 2012 | Sz   | 12 | MNI | 50/26/6    | -22/30/46 | -        | -        | -          | -          |
| van der Meer | 2014 | Sz   | 20 | MNI | -38/22/-10 | -         | -        | -        | -38/-66/26 | -          |
| Koenigsberg  | 2009 | BPD  | 18 | MNI | -          | -         | 30/6/-22 | -4/30/36 | 30/-52/44  | -          |
|              |      |      |    |     |            |           |          |          | -40/-50/54 |            |
| Schulze      | 2011 | BPD  | 15 | MNI | -48/28/-6  | -36/16/52 | -        | -        | 50/-54/22  | 30/-16/68  |
|              |      |      |    |     |            |           |          |          |            | -28/-22/72 |
| Lang         | 2012 | BPD  | 14 | -   | -          | -         | -        | -        | -          | -          |
| Denny        | 2015 | AvPD | 17 | -   | -          | -         | -        | -        | -          | -          |

**Supplementary table 1.**

**Reported coordinates for group differences during downregulation of emotion reported by fMRI studies.**

All brain regions from table 2 are listed. The n reported is the number of participants in the patient group.

Abbreviations: MNI = Montreal Neurological Institute, TAL = Talairach

vIPFC = ventrolateral prefrontal cortex, dlPFC = dorsolateral prefrontal cortex, dACC = dorsal anterior cingulate, SMA = supplementary motor area, PM = premotor cortex

MDD = Major Depressive Disorder, rMDD = remitted Major Depressive Disorder, BD = Bipolar Disorder, PTSD = Posttraumatic Stress Disorder, GAD = Generalized Anxiety Disorder, SAD = Social Anxiety Disorder, PD = Panic Disorder, OCD = Obsessive Compulsive Disorder, CUD = Cocaine use Disorder, ND = Nicotine Dependence, Sz = Schizophrenia, BPD = Borderline Personality Disorder, AvPD = Avoidant Personality Disorder

| First author             | Year | Population | n  | Analysis space | vIPFC     | dIPFC         | amygdala   | dACC     | parietal | SMA/PM   |
|--------------------------|------|------------|----|----------------|-----------|---------------|------------|----------|----------|----------|
| <b>Mood disorders</b>    |      |            |    |                |           |               |            |          |          |          |
| Beauregard               | 2006 | MDD        | 12 | -              | -         | -             | -          | -        | -        | -        |
| Johnstone                | 2007 | MDD        | 21 | -              | -         | -             | -          | -        | -        | -        |
| Heller                   | 2009 | MDD        | 27 | -              | -         | -             | -          | -        | -        | -        |
| Dillon                   | 2013 | MDD        | 12 | -              | -         | -             | -          | -        | -        | -        |
| Wang                     | 2014 | MDD        | 12 | TAL            | -48/20/-4 | -             | -20/-2/-16 | -        | -        | -        |
| Greening                 | 2014 | MDD        | 19 | -              | -         | -             | -          | -        | -        | -        |
| Morris                   | 2012 | BD         | 13 | MNI            | 40/40/-10 | peak in vIPFC | -          | 10/46/18 | -        | -        |
| Kanske                   | 2015 | BD         | 22 | -              | -         | -             | -          | -        | -        | -        |
| <b>Anxiety disorders</b> |      |            |    |                |           |               |            |          |          |          |
| New                      | 2009 | PTSD       | 14 | MNI            | -         | -             | -          | -        | -        | -6/15/52 |
| Blair                    | 2012 | GAD        | 17 | MNI            | -         | -             | -          | -5/12/35 | -        | -        |
| Blair                    | 2012 | GAD/SAD    | 17 | MNI            | -         | -             | -          | -5/12/35 | -        | -        |
| Blair                    | 2012 | SAD        | 19 | MNI            | -         | -             | -          | -5/12/35 | -        | -        |
| Gaebler                  | 2014 | SAD        | 21 | -              | -         | -             | -          | -        | -        | -        |
| <b>Other disorders</b>   |      |            |    |                |           |               |            |          |          |          |
| Morris                   | 2012 | Sz         | 12 | MNI            | 40/42/-10 | peak in vIPFC | -          | 8/42/18  | -        | -        |
| Schulze                  | 2011 | BPD        | 15 | -              | -         | -             | -          | -        | -        | -        |
| Lang                     | 2012 | BPD        | 14 | MNI            | -         | -             | -          | -3/35/10 | -        | -        |

**Supplementary table 2.**

**Reported coordinates for group differences during upregulation of emotion reported by fMRI studies.**

All brain regions from table 3 are listed. The n reported is the number of participants in the patient group.

Abbreviations: MNI = Montreal Neurological Institute, TAL = Talairach

vIPFC = ventrolateral prefrontal cortex, dIPFC = dorsolateral prefrontal cortex, dACC = dorsal anterior cingulate

MDD = Major Depressive Disorder, rMDD = remitted Major Depressive Disorder, BD = Bipolar Disorder, PTSD = Posttraumatic Stress Disorder, GAD = Generalized Anxiety Disorder, SAD = Social Anxiety Disorder, PD = Panic Disorder, OCD = Obsessive Compulsive Disorder, CUD = Cocaine use Disorder, ND = Nicotine Dependence, Sz = Schizophrenia, BPD = Borderline Personality Disorder, AvPD = Avoidant Personality Disorder
